# Supplementary material for: Generation of an Isogenic Hereditary Hemorrhagic Telangiectasia Model via Prime Editing in Human Induced Pluripotent Stem Cells
Source: PubMed Central journal article supplement — Int J Stem Cells. 2024 Sep 6;17(4):397–406. doi: 10.15283/ijsc24084 (PMC11612218; doi:10.15283/ijsc24084), 2024-09-06
Supplement: ijsc-17-4-397-supple.pdf [file ijsc-17-4-397-supple.pdf]

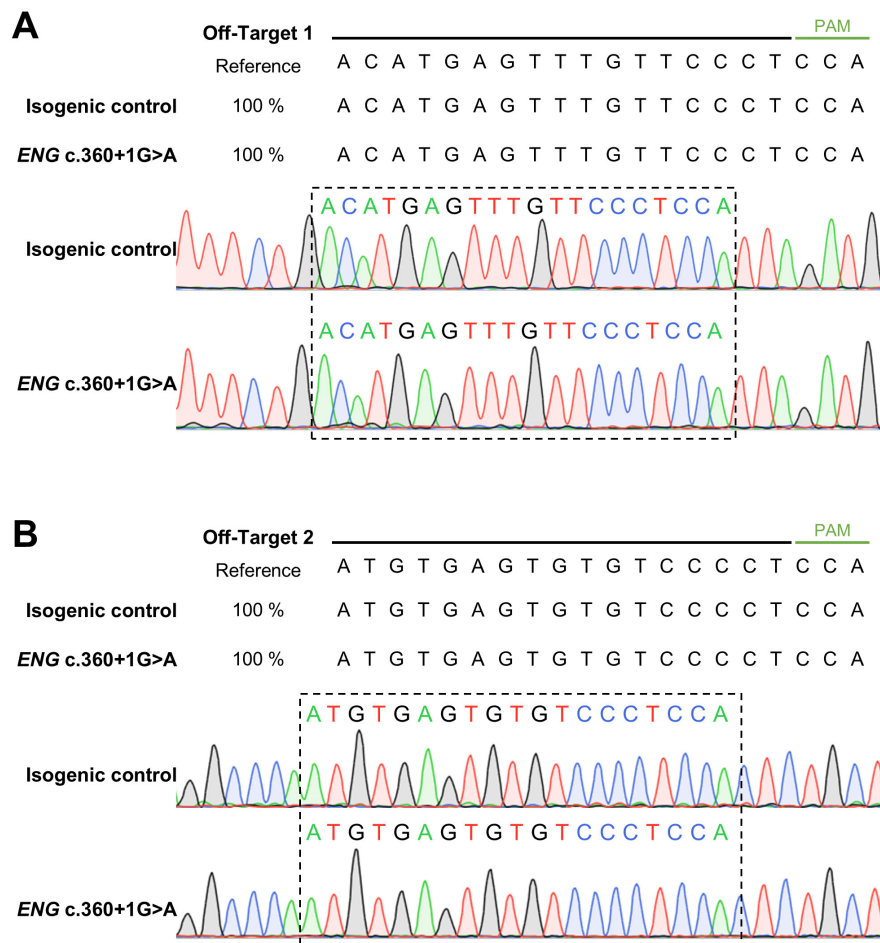

**Supplementary Fig. S1.** Off-target analysis in the established hereditary hemorrhagic telangiectasia human induced pluripotent stem cell (HHT hiPSC) line. (A, B) Off-target analysis of the top 2 identified off-target (OT) sites by pegIT in prime-edited hiPSC line (*ENG* c.360+1G>A) by Sanger sequencing. The results demonstrate absence of OT effects in prime-edited hiPSC line.
